# Supplementary material
Source: PubMed Central journal article supplement (PMC7995134)
Supplement: jama-e214682-s001.pdf [file jama-e214682-s001.pdf]

1  
2 **HElmet NonInvasive Ventilation versus high-flow Oxygen Therapy in**  
3 **acute hypoxemic respiratory failure**

4 **A pilot, open-label, multicentre randomized trial**

5 **The HENIVOTpilot study**

6 **Coordinator centre**

7 **Massimo Antonelli, MD**

8 **Department of Anesthesiology and Intensive Care Medicine**

9 **Catholic University of The Sacred Heart**

10 **Rome**

11 **Italy**

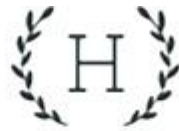

13 **HENIVOT**

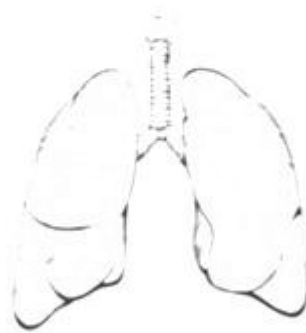

15

16

17

18

19

20 **HELMET NIV VS. HIGH-FLOW OXYGEN**  
**IN ACUTE RESPIRATORY FAILURE**

21

22 <https://clinicaltrials.gov/ct2/show/NCT04502576>

# Contents

|    |                                              |    |
|----|----------------------------------------------|----|
| 23 |                                              |    |
| 24 | Background .....                             | 5  |
| 25 | Methods .....                                | 7  |
| 26 | Design.....                                  | 7  |
| 27 | Setting.....                                 | 7  |
| 28 | Protocol .....                               | 10 |
| 29 | Assessment of the oxygenation criteria ..... | 10 |
| 30 | Randomization.....                           | 11 |
| 31 | Study treatments .....                       | 12 |
| 32 | Standard Management .....                    | 16 |
| 33 | Hemodynamic management .....                 | 16 |
| 34 | Nutrition/Glucose Control .....              | 17 |
| 35 | Rescue therapies .....                       | 17 |
| 36 | Measurements.....                            | 20 |
| 37 | Outcome measures.....                        | 23 |
| 38 | Primary endpoint .....                       | 23 |
| 39 | Secondary endpoints.....                     | 23 |
| 40 | Power analysis .....                         | 25 |
| 41 | Statistical analysis .....                   | 26 |
| 42 | Appendix .....                               | 27 |
| 43 | References .....                             | 34 |
| 44 |                                              |    |
| 45 |                                              |    |

HELMET NIV VS. HIGH-FLOW OXYGEN  
IN ACUTE RESPIRATORY FAILURE

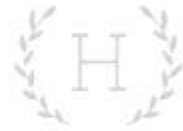

HENIVOT

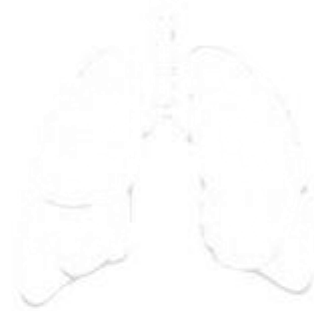

HELMET NIV VS. HIGH-FLOW OXYGEN  
IN ACUTE RESPIRATORY FAILURE

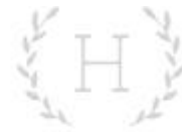

HENIVOT

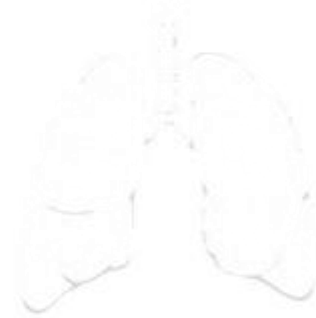

HELMET NIV VS. HIGH-FLOW OXYGEN  
IN ACUTE RESPIRATORY FAILURE

49 **Background**

50 Non-invasive positive pressure ventilation (NIV) has been convincingly shown to be safe  
51 and effective as first line treatment in patients with acute hypercapnic respiratory failure  
52 and acute cardiogenic pulmonary oedema [1–4]. Despite some data suggest NIV may  
53 also avoid intubation in heterogeneous categories of patients with acute hypoxemic  
54 respiratory failure (AHRF)[5–11], its safety and efficacy in such a context is still  
55 debated, given the high failure rate and the possible detrimental effect on the clinical  
56 outcome [12–16].

57 Nasal high flow oxygen (NHF) is a new and promising tool for oxygen therapy in  
58 critically ill patients: NHF allows accurate delivery of the set  $FiO_2$ , anatomical dead  
59 space clearance due to a washout effect in the upper airways and provides a small,  
60 variable amount of positive end end-expiratory pressure[12,17–21]. Different studies  
61 have investigated its safety and efficacy in several clinical settings[20,22,23] and a  
62 multicentre randomized controlled trial showed that NHF, as compared to NIV sessions  
63 delivered via a face mask, may reduce the intubation rate and improve clinical outcome  
64 in severely hypoxemic patients with *de novo* AHRF[24].

65 As patients' comfort is crucial for NIV success, over the last years a great effort has been  
66 made to optimize NIV tolerability. Different interfaces are available for non-invasive  
67 ventilation[25]: in spite of face masks being more commonly used, helmet has been  
68 shown to improve patients' comfort, allowing patients' interaction, speech, feeding and  
69 not limiting cough. Nonetheless, skin necrosis, gastric distension, or eye irritation are  
70 seldom observed during helmet NIV, while may be consequences of long-term  
71 treatments with face masks[26,27].

72 Moreover, differently from face masks, helmets permit longer-term treatments and allow  
73 the setting of higher levels of PEEP without causing air leaks; this aspect may be crucial

74 when treating severely hypoxemic patients with acute respiratory failure and the acute  
75 respiratory distress syndrome (ARDS)[28]. Interestingly, higher PEEP during fully  
76 controlled mechanical ventilation in the early phase of the disease improves mortality in  
77 ARDS patients and raising evidence indicates that it may exert beneficial effects also if  
78 spontaneous breathing is maintained [28–30]. In this sense, a recent randomized  
79 controlled trial comparing continuous NIV delivered with helmet or face-mask in patients  
80 with ARDS showed a lower intubation rate and a lower 90-day mortality in patients in  
81 the helmet group who, accordingly, underwent treatments with higher PEEP and lower  
82  $FiO_2$ [31].

83 We previously showed that helmet NIV may provide physiological benefits over NHF  
84 [32], but whether first-line treatment with helmet NIV as compared to NHF may improve  
85 clinical outcome in acute hypoxemic respiratory failure remains uncertain.

86 The uncertainty about the initial management of acute hypoxemic respiratory failure  
87 has been emphasized by the recent COVID-19 pandemic. SARS-COV-2 is a novel  
88 coronavirus with an outbreak of unusual viral pneumonia in Wuhan, China, and that  
89 progressively became pandemic. In some patients (5-15%), it can cause acute hypoxemic  
90 respiratory failure and Acute Respiratory Distress Syndrome (ARDS) needing ventilatory  
91 support and admission to the intensive care unit (ICU).

92 We designed an open-label, multicentre randomized trial to assess first-line treatment  
93 with helmet NIV as compared to NHF may increase the amount of 28-day ventilatory  
94 support-free days of patients admitted to the intensive care unit due to acute hypoxemic  
95 respiratory failure.

96

97

98 **Methods**

99 *Design*

100 Open-label multicentre randomized trial.

101 *Objectives*

102 To demonstrate a clinical benefit by the early application of Helmet NIV in patients with  
103 acute hypoxemic respiratory failure, as compared to NHF.

104 *Setting*

105 This is a multi-centre study. Eligible patients will be screened in the ICUs at the  
106 “Fondazione Policlinico Universitario A. Gemelli IRCCS” (Rome, Italy), and the  
107 “Policlinico SS. Annunziata” (Chieti, Italy). Further centres in Italy will be eventually  
108 involved according to availability of resources, materials and investigators, that are  
109 limited for ICU personnel due to the COVID-19 pandemic. All recruiting centres will be  
110 run by personnel with experience in the use of non-invasive ventilation.

111

112

113



HELMET NIV VS. HIGH-FLOW OXYGEN  
IN ACUTE RESPIRATORY FAILURE

114 ***Patients***

115 All consecutive adult patients suffering from *de novo* acute hypoxemic respiratory failure  
116 will be assessed for the enrolment.

117 Acute hypoxemic respiratory failure will be defined as:

- 118 - Symptoms onset within 14 days before the assessment for enrolment in the study;
- 119 - Oxygenation impairment ( $SpO_2 < 90\%$  in ambient air, or requirement for oxygen  
120 supplementation according to the decision of the attending physician).

121 Eligibility inclusion criteria will be assessed within the first 72 hours from ICU  
122 admission and preferentially while patients receive standard oxygen therapy  
123 (VenturiMask). In case this is not available, patients will be evaluated during oxyged  
124 while are receiving oxygen therapy through a non-rebreather reservoir bag mask, with  
125  $FiO_2$  estimated as  $0.21 + \text{oxygen flow rate in L/min} \times 3$  [33].

126 Patients will be considered eligible, whether all the following inclusion criteria are met:

- 127 1.  $PaO_2/FiO_2$  ratio  $\leq 200$ ;
- 128 2.  $PaCO_2 \leq 45$ mmHg;
- 129 3. Absence of history of chronic respiratory failure or moderate to severe cardiac  
130 insufficiency (NYHA>2 or left ventricular ejection fraction<50%);
- 131 4. The informed consent form needs to be signed and dated by the patient or a  
132 relative/legal guardian before of any procedure related to the study; if the patient is  
133 initially unable to sign the informed consent form, but later regains the ability to sign it, a  
134 new informed consent form will be given to the patient and must be signed and dated.

135 Exclusion criteria:

- 136 • Pregnancy;
- 137 • Body mass index>40;
- 138 • Exacerbation of asthma or chronic obstructive pulmonary disease;



- 139 • Known hypercapnia ( $\text{PaCO}_2 > 45$  mmHg) with or without respiratory acidosis;
- 140 • More than 2 organ failures, including the lung.
- 141 • Documented pneumothorax;
- 142 • Clinical diagnosis of Cardiogenic pulmonary oedema;
- 143 • Haemodynamic instability (Systolic blood pressure  $< 90$  mmHg or mean arterial
- 144 pressure  $< 65$  mmHg) and/or lactic acidosis (lactate  $> 5$  mmol/L) and/or clinically
- 145 diagnosed Shock requiring administration of vasoactive agents (norepinephrine  $> 0.1$
- 146 mcg/Kg/min);
- 147 • Metabolic Acidosis (pH  $< 7.30$  with normal- or hypo-carbia);
- 148 • Chronic kidney failure requiring dialysis before ICU admission;
- 149 • Chronic hypoxemic respiratory failure requiring long-term oxygen therapy;
- 150 • Altered neurological status that requires immediate intubation and/or making the
- 151 patient uncooperative;
- 152 • Urgent need for endotracheal intubation, according to the decision of the attending
- 153 physician;
- 154 • Do not intubate order;
- 155 • Decision of withdrawal of life-sustaining therapy;
- 156 • Thoracic or abdominal surgery in the previous 7 days;
- 157 • Any condition that makes the patient very likely to require endotracheal intubation
- 158 due to a reason different from respiratory failure;
- 159 • Recent head surgery or anatomy that prevent the application of helmet or Optiflow to
- 160 patient's face.

161 Patients that have already received NIV continuously for more than 12 hours before the

162 screening visit will be excluded.

163

164 ***Protocol***

165

166 *Assessment of the oxygenation criteria*

167 Nonhypercapnic patients with a  $\text{PaO}_2/\text{FiO}_2 \leq 200$  mmHg will be enrolled.

168 In the absence of exclusion criteria, and if all others inclusion criteria are met, patients  
169 showing  $\text{PaO}_2/\text{FiO}_2 \leq 300$  and  $>200$  mmHg will be treated according to the clinical  
170 practice of each institution and eventually reassessed for the presence of oxygenation  
171 criterion up to 72 hours from ICU admission.

172

173

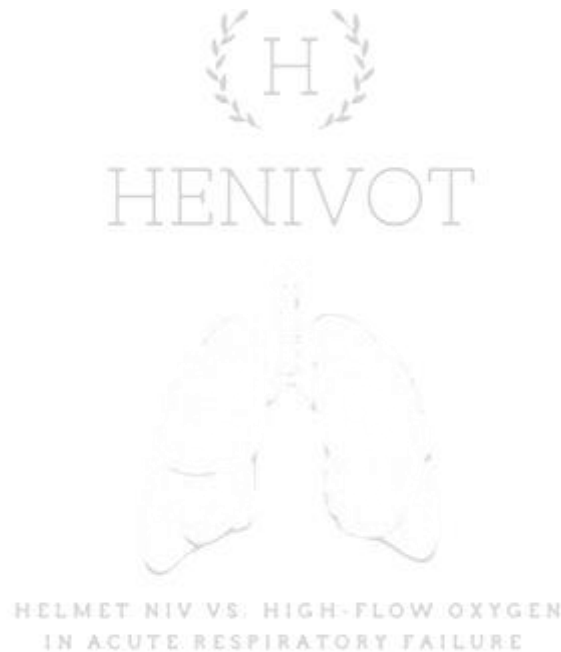

174  
175  
176  
177  
178  
179  
180  
181  
182  
183  
184  
185  
186

*Randomization*

Enrolled patients will be randomized in a 1:1 ratio to receive helmet PSV or NHF as first-line treatment for AHRF. A computer-generated permuted block randomization scheme with varying block sizes ranging from 3 to 9 managed by a centralized web-based system will be used to allocate patients to each group.

Randomization will be stratified according to the presence of SARS-CoV-2 infection (diagnosed with a positive polymerase chain reaction (PCR) testing of the nasopharyngeal or tracheal sample)

Patients will have to undergo the allocated treatment within 1 hour from the moment of enrolment criteria validation.

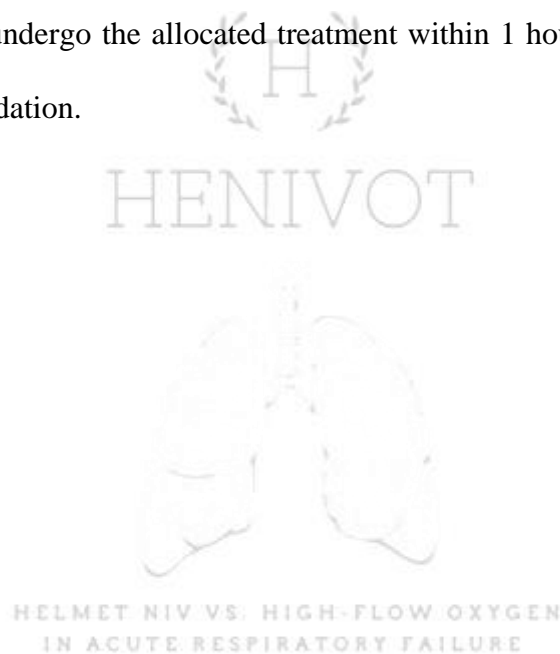

187 *Study treatments*

188 In both arms, the treatment according to the assigned protocol will be continued until the  
189 patient requires endotracheal intubation or (in case of no intubation) up to ICU discharge.  
190 Patients will have to undergo the allocated treatment within 1 hour from the moment of  
191 oxygen criteria validation.

192

193 High-flow oxygen therapy

194 Nasal high flow oxygen therapy will be delivered with the Optiflow system.

195 Initial set flow will be  $\geq 50$  /min, and flows will be decreased in case of intolerance  
196 and/or according to patients' requirements: flows  $\geq 30$  L/min will be mandatory in all  
197 enrolled patients. Humidification chamber (MR860, Fisher and Paykel healthcare, New  
198 Zealand) will be set at 37 °C or 34 °C according to patient's comfort[34]. FiO<sub>2</sub> will be  
199 titrated to obtain an SpO<sub>2</sub>  $\geq 92\%$  and  $\leq 98\%$ .

200 Weaning the patient from NHF will be considered only after 48 hours from enrolment.

201 Weaning from NHF within the first 2 days of the study will be allowed only whether the  
202 patient is considered for ICU discharge, according to the decision of the attending  
203 physician.

204 All enrolled patients will be discharged from the ICU while undergoing low-flow  
205 oxygen, according to the prescription of the attending physician and the clinical practice  
206 of each participating institution (VenturiMask, nasal prongs, non-rebreathing oxygen  
207 mask). As suggested by Maggiore (NCT02107183), weaning from NHF will be allowed  
208 when FiO<sub>2</sub>  $< 40\%$  and respiratory rate  $< 25$ /min. Oxygen flow will be lowered to 10 L/min,  
209 keeping FiO<sub>2</sub> unchanged. Weaning from NHF will be considered successful if the SpO<sub>2</sub>  
210 remains between 92% and 98% and the respiratory rate  $\leq 25$ /min with an oxygen flow of

211 10 L/min. In this case, the NHF device will be replaced by the low-flow oxygen and  
212 oxygen flow or  $FiO_2$  will be set to obtain the same  $SpO_2$  target.  
213 NHF treatment can be resumed any time if the patient is experiencing respiratory distress  
214 and hypoxemia, according to the prescription of the attending physician.  
215  
216

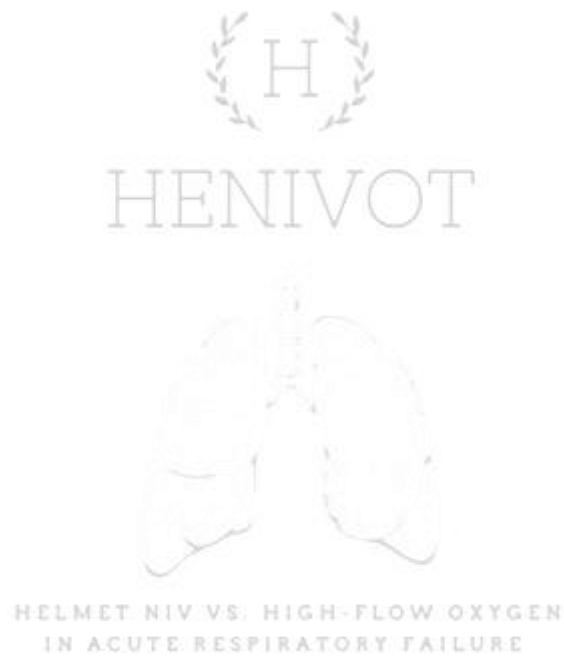

217 Helmet PSV

218 Patients in PSV group will receive continuous helmet pressure support ventilation for at  
219 least 16 hours/day the first 2 calendar days. Continuous NIV without interruptions will be  
220 strongly encouraged in the first 24 hours of treatment. When NIV is interrupted, patients  
221 will receive low flow oxygen therapy or nasal high flow oxygen therapy, according to  
222 physician's decision. Dedicated helmets for NIV (Dimar, Italia, or Intersurgical, UK) and  
223 size will be chosen according to neck circumference, as suggested by Antonelli et al.  
224 [26], or according to manufacturer recommendations, if present (Appendix, table 1).

225 Each patient will be connected to an ICU compressed gas based ventilator through a  
226 bitube circuit with no humidification

227 The ventilator will be set in PSV (the choice to use NIV modes will be left to the  
228 decision of the physician in charge of the patient), with the following suggested settings  
229 [35–39]:

- 230 1. initial pressure support  $\geq 8-10$  cmH<sub>2</sub>O and adequate to permit of a peak in the  
231 inspiratory flow of 100 l/min;
- 232 2. positive end-expiratory pressure  $\geq 10$  cmH<sub>2</sub>O and increased to achieve the  
233 oxygenation target according to the choice of the attending physician.
- 234 3. FiO<sub>2</sub> will be titrated to obtain an SpO<sub>2</sub>  $\geq 92\%$  and  $\leq 98\%$ .
- 235 4. Inspiratory flow trigger = 1 l/min or according to the practice of each institution;
- 236 5. fastest pressurization time;
- 237 6. expiratory trigger: 10-50% of the maximum inspiratory flow;
- 238 7. maximum inspiratory time 1.2 second.

239 The use of earplugs to mitigate noise-related discomfort will be allowed according to the  
240 decision of the attending physician and will be encouraged especially overnight.

241 Any modification in the ventilator settings and in the interface set-up to optimize comfort  
242 and patient-ventilator interaction will be allowed at the discretion of the attending  
243 physicians. However, maintenance of PEEP  $\geq 10$  during the treatment is mandatory.

244 Weaning from PSV will be discouraged within the first 48 hours from enrolment.  
245 Weaning from PSV at any time will be attempted only whether  $FiO_2 \leq 40\%$ , respiratory  
246 rate  $\leq 25$ : to assess the readiness for interrupting PSV, PEEP will be lowered to 8  
247  $cmH_2O$  with pressure support = 8  $cmH_2O$ , keeping  $FiO_2$  unchanged. If the patient  
248 maintains  $SpO_2 \geq 92\%$  and respiratory rate  $\leq 25$  during the following 30 minutes with these  
249 settings, PSV weaning will be considered successful. After weaning from PSV and  
250 between two NIV sessions, patients will undergo low-flow, VenturiMask or NHF,  
251 according to the choice of the attending physician: oxygen flow or  $FiO_2$  will be set to  
252 obtain the same  $SpO_2$  target.

253 PSV will be resumed at any time if the respiratory rate is more than 25 breaths per  
254 minute and  $SpO_2$  is less than 92% with and/or anytime deemed necessary by the  
255 attending physician.

256  
257 HELMET NIV VS. HIGH-FLOW OXYGEN  
IN ACUTE RESPIRATORY FAILURE

258

259 *Standard Management*

260 In both arms, standard care (diagnostic tests, antibiotics administration, fluid therapy,  
261 haemodynamic management) will be applied according to the clinical practice of each  
262 institution.

263 Mild sedation will be allowed during the treatment in both groups to achieve a RASS=0  
264 and according to the physician's preference, but the contemporary use of sedative and  
265 analgesic drugs will be not allowed [40].

266 In NHF group, a NIV trial with face mask before endotracheal intubation will be only  
267 allowed in case of hypercapnia and respiratory acidosis (i.e.  $\text{PaCO}_2 > 45$  mmHg with  
268  $\text{pH} < 7.35$ ). Similarly, in helmet group, a NIV trial with oro-nasal or full face mask will be  
269 permitted in case of hypercapnia with acidosis (i.e.  $\text{PaCO}_2 > 45$  mmHg with  $\text{pH} < 7.35$ ).

270 Allocated treatment will be resumed as soon as hypercapnia is deemed resolved by the  
271 attending physician.

272

273 *Hemodynamic management*

274 Fluid overload will be discouraged. If appropriate fluid challenge fails to restore adequate  
275 blood pressure and organ perfusion and if the patient is deemed not to be fluid-  
276 responsive, therapy with vasopressor agents will be started.

277 Severe haemodynamic instability, cardiac arrest, pneumothorax or any other adverse  
278 event possibly related or worsened by the assigned treatments will be recorded in the  
279 CRF.

280 Norepinephrine will be the first-choice vasopressor agent to correct hypotension in septic  
281 shock.

282 Vasopressin use may be considered in patients with refractory shock despite adequate  
283 fluid resuscitation and high-dose conventional vasopressors.





301 ***Treatment failure***

302 In the entire cohort, the final decision to intubate the patient will be left to the attending  
303 physician.

304 However, in order to avoid any delay in intubation, and to standardize the treatment in  
305 both groups, coherently with previous studies with similar design, the decision to  
306 intubated will be based on predefined criteria [5,24,31].

307 Patients will be intubated in case of persisting or worsening respiratory failure, defined  
308 by at least two of the following:

- 309 1. worsening or unchanged unbearable dyspnea
- 310 2. lack of improvement in oxygenation
- 311 3. lack of improvement of signs of respiratory-muscle fatigue
- 312 4. development of unmanageable tracheal secretions
- 313 5. respiratory acidosis with a pH below 7.30 despite NIV with face mask
- 314 6. SpO<sub>2</sub> below 90% for more than 5 min without technical dysfunction
- 315 7. intolerance to the used device

316 Patients will also be intubated in case of hemodynamic instability (SBP below 90 mmHg,  
317 MBP below 65 mmHg and/or requirement for high-dosage vasopressors and/or  
318 hyperlactatemia) or deterioration of neurologic status with a Glasgow coma scale below  
319 12 points.

320 Since the final decision on intubation will be left to the physician in charge that cannot be  
321 blinded to the study group, an Adjudication Committee will verify whether the decision  
322 to intubate was unbiased and in compliance with the required criteria, as already  
323 suggested by Maggiore et al. (NCT02107183). Three physicians, with expertise in the  
324 field, not directly involved in the study and blinded to patients' allocation, will review *a*

325 *posteriori* the records of all intubated patients and verify the presence of intubation  
326 criteria.

327 After intubation, patients will be managed according to the clinical practice of each  
328 institution: however, tidal volume exceeding 8 ml/Kg IBW will be avoided in all patients  
329 as a standard of care and tidal volume of 6 ml/kg IBW will be strongly encouraged in  
330 ARDS patient during the acute phase of the disease. Forty-eight hours of paralysis and  
331 prone position are suggested in ARDS patients with  $\text{PaO}_2/\text{FiO}_2 < 150$  mmHg after  
332 intubation and/or anytime during the ICU stay.

333 A daily assessment for readiness for undergoing a spontaneous breathing trial will be  
334 done (Appendix).

335 Patients in both groups will receive NHF after extubation[23]. Pre-emptive NIV (any  
336 interface allowed) after extubation will be allowed in prolonged to wean patients (i.e.  
337 more than 3 SBT failure or more than 7 days from the first SBT to being  
338 extubated)[16,41,42]. In case of respiratory failure during oxygen therapy via high flow  
339 nasal cannula after extubation, a rescue NIV (any interface allowed) trial will be allowed  
340 before reintubation in all enrolled patients at the discretion of the attending physician.

341 Decision to perform tracheostomy to enhance the weaning process will be left to the  
342 attending physicians.

343

344

345 ***Measurements***

346 Patient's demographics will be collected at study entry:

- 347 • initials, age, sex, height, weight, BMI;
- 348 • cause of hospital and ICU admission;
- 349 • SAPS II;
- 350 • SOFA score;
- 351 • timing of respiratory symptoms onset;
- 352 • date and time of hospital admission;
- 353 • Time of stay in medical or surgical ward before randomization;
- 354 • Time of ICU stay before randomization;
- 355 • Date and time of enrolment;
- 356 • Main comorbidities;
- 357 • NYHA category before respiratory failure;
- 358 • Body temperature;
- 359 • Presence of bilateral or monolateral infiltrates at the chest x-ray (jpeg images) or  
360 chest CT scan (whether available);
- 361 • Baseline clinical parameters: arterial pressure, heart rate, respiratory rate, SpO<sub>2</sub>  
362 and blood gases (PaO<sub>2</sub>, PaCO<sub>2</sub>, pH and PaO<sub>2</sub>/FiO<sub>2</sub>, serum lactate),;
- 363 • IL-6, C Reactive Protein, ferritin and D-Dimer will be measured according to the  
364 practice of each institution;
- 365 • Time from oxygen criteria validation and beginning of assigned treatment.

366

367 Following data will be recorded 1-6-12-24-48 hours from randomization and then on a  
368 daily basis (72-96-120...etc.) up to 28 days or ICU discharge.

- 369
- Ventilatory management
- 370
- ✓ **NHF group:** NHF settings (flows, humidification chamber temperature,
- 371
- FiO<sub>2</sub>) or VenturiMask settings (FiO<sub>2</sub>)
- 372
- ✓ **Helmet PSV group:** NIV settings (pressure support, FiO<sub>2</sub>, PEEP, cycling off
- 373
- criteria, maximum inspiratory time, peak inspiratory flow) or, if, receiving
- 374
- low-flow oxygen, oxygen therapy settings (device, flow, flow-FiO<sub>2</sub>).
- 375
- ✓ **Intubated patients, after treatment failure:** type of ventilation, FiO<sub>2</sub>, tidal
- 376
- volume, mean airway pressure, PEEP, Pplat if available, minute ventilation,
- 377
- respiratory rate, proportion of spontaneous ventilation on minute ventilation
- 378
- Respiratory rate, SpO<sub>2</sub>, pH, PCO<sub>2</sub>, PaO<sub>2</sub>, SaO<sub>2</sub>, PaO<sub>2</sub>/FiO<sub>2</sub>;
- 379
- Heart Rate, arterial blood pressure;
- 380
- If patient is not intubated, dyspnoea, as defined by a visual analogic scale
- 381
- (Appendix, Figure 1) (VAS), discomfort related to the device, as defined by a visual
- 382
- analogic scale (VAS) adapted to rate the procedural pain of ICU patients (Appendix,
- 383
- Figure 2)[43];
- 384
- Richmond agitation and sedation scale (RASS) (Appendix, Figure 3) and sedative
- 385
- drugs administered, if any;
- 386
- IL-6, C Reactive Protein, ferritin and D-Dimer will be measured (only on a daily basis).
- 387
- Simplified organ failure assessment score (SOFA) (Appendix, Table 1), modified clinical
- 388
- pulmonary infection score (CPIS) (Appendix, Table 2) will be calculated daily.
- 389
- The hours spent by the patient on NIV, NHF, low-flow oxygen or invasive mechanical
- 390
- ventilation will be also recorded daily.
- 391
- The total hours during the ICU stay spent by the patient in the prone positioning will be
- 392
- recorded.

393 At ICU discharge, in-ICU mortality will be recorded. Tracheostomized patients  
394 discharged while receiving mechanical ventilation will be recorded as well.

395 At hospital discharge, 90-day and in-hospital mortality and the days without invasive  
396 ventilation on a 28,60 and 90-day basis will be recorded.

397 The daily cumulative doses of vasopressors (norepinephrine, adrenaline, dobutamine),  
398 sedative and analgesic agents (sufentanil, propofol, midazolam, dexmedetomidine), the  
399 total amount of administered crystalloids and colloids, the use of diuretics, diuresis and  
400 net fluid balances will be calculated for each patient and recorded.

401 To assess quality-adjusted life year (QUALY), patients discharged alive from the  
402 hospital will be contacted 6 and 12 months from hospital discharge and will ask to  
403 undergo a telephone interview to answer the Short-form 36 (SF-36) questionnaire.

404

405

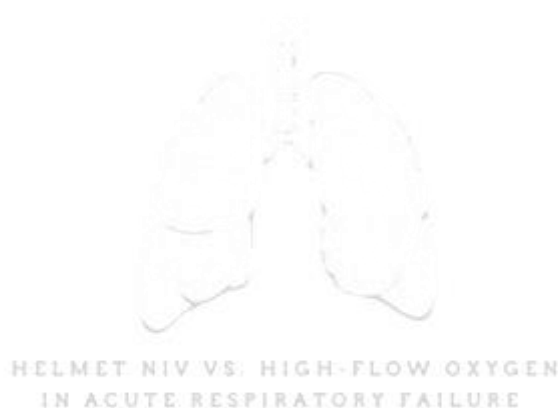

406 **Outcome measures**

407

408 *Primary endpoint*

409 The primary outcome will be the number of ventilatory support-free days at day 28 day  
410 from enrolment. Ventilatory support will include: invasive positive pressure ventilation  
411 (through endotracheal tube or tracheostomy), noninvasive ventilation and NHF.

412

413 *Secondary endpoints*

414 Main secondary endpoints will be:

- 415 1. the proportion of patients who require endotracheal intubation within 28 days  
416 from study enrolment
- 417 2. 28-day, 60-day mortality, 90-day mortality
- 418 3. 'In-hospital' mortality
- 419 4. Days of ICU stay after randomization
- 420 5. Days of hospital stay after randomization
- 421 6. 6- and 12-month quality of life

422 The main safety endpoints will be:

- 423 1. In patients meeting the primary endpoint, time (hours) from randomization to  
424 intubation.
- 425 2. Among patients meeting the primary endpoint, proportion of patients requiring  
426 'emergency intubation', defined according to the judgement of the attending physician.
- 427 3. Among patients meeting the primary endpoint, the cause of non-invasive treatment  
428 failure (as defined by the intubation criteria).

429 Other explored endpoints will be:

- 430 • PaO<sub>2</sub>/FiO<sub>2</sub> ratio at 1-6-12-24-48-72 hours after randomization

- 431 • PaCO<sub>2</sub> 1-6-12-24-48-72 hours after randomization
- 432 • Respiratory rate 1-6-12-24-48-72 hours after randomization
- 433 • Discomfort related to the device 1-6-12-24-48-72 hours after randomization
- 434 • Dyspnoea 1-6-12-24-48-72 hours after randomization at the different timepoints.
- 435 • Daily measured SOFA
- 436 • Rate of hospital acquired pneumonia
- 437 • Catecholamine-free days/days of ICU stay

438

439

440

441

442

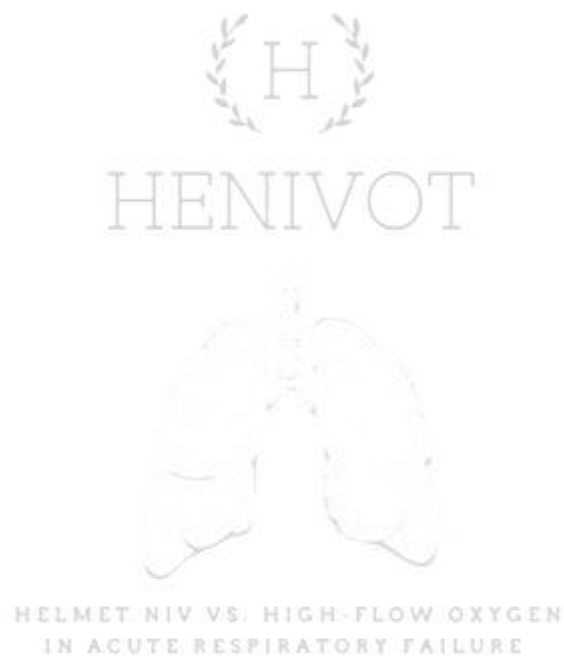



443 **Power analysis**

444 Systematic data about the total duration of respiratory support in patients affected by  
445 hypoxemic respiratory failure with PaO<sub>2</sub>/FiO<sub>2</sub> lower than 200 mmHg and treated solely  
446 with high-flow nasal oxygen are lacking. Data from a single-center exploratory report  
447 indicate that the mean 28-day respiratory support-free days of patients receiving first line  
448 treatment with high-flow nasal oxygen is 11.6±5 days [24]. We hypothesized that this  
449 parameter would be 25% higher in patients receiving helmet noninvasive ventilation  
450 (14.5 days). Assuming a normal distribution of the primary endpoint, we calculated that  
451 the enrolment of 50 patients per group would provide 80% power to detect a 25%-  
452 increase in the number of ventilatory-support free days on a 28-day basis in the helmet  
453 group, with an alpha level of 0.05. The attrition rate was expected to be smaller than 10%  
454 and likely due to protocol violations, absence of objective criteria to define the need for  
455 endotracheal intubation, cross-over and drop-outs. We planned to enrol a total of 110  
456 patients.

457

458

459

460



HELMET NIV VS. HIGH-FLOW OXYGEN  
IN ACUTE RESPIRATORY FAILURE

461 **Statistical analysis**

462 Results will be expressed as mean  $\pm$  SD or median [interquartile range] or number of  
463 events [%]. All data collected will be tabulated descriptively by study group and analysed  
464 on an intention-to-treat basis. In addition, a *per protocol* analysis will be conducted on  
465 the patients who successfully underwent the allocated treatments for the time defined by  
466 the study protocol.

467 Comparisons between groups regarding qualitative variables will be performed with the  
468 Chi-Squared test or the Fisher's exact test, as appropriate. Ordinal qualitative variables or  
469 non-normal quantitative variables will be compared Mann-Whitney test. Quantitative  
470 normal variables will be compared with the Anova test. Kaplan-Meier curves will be  
471 displayed for significant results concerning intubation rate and mortality.

472 Inter-group differences in quantitative variables distribution at different timepoints will  
473 be assessed with ANOVA for repeated measures.

474 Prespecified subgroup analyses according to the following characteristics will be  
475 performed:

- 476 • Patients with AHRF due to COVID-19
- 477 • Patients with bilateral pulmonary infiltrates at study inclusion
- 478 • History or no history of cardiac failure
- 479 • Patients older than 65 years.
- 480 • Patients with  $\text{PaCO}_2 \geq 40$  at study inclusion
- 481 • Respiratory rate  $\geq 35$  at study inclusion (measure at the moment of the oxygenation  
482 criteria validation while receiving 50 L/min of 50% oxygen via a face mask).
- 483 •  $\text{P/F} \leq 120$  at study inclusion.
- 484 • Immunocompromised patients.

485 All analyses will be performed applying a bilateral hypothesis.

486

## Appendix

487 Table 1. Helmet size according to neck circumference.

| Neck circumference (cm) | Helmet Size |
|-------------------------|-------------|
| 17-22.7                 | Extra small |
| 27-34                   | Small       |
| 34-40                   | Medium      |
| 40-47                   | Large       |
| > 45                    | Extra large |

488

489

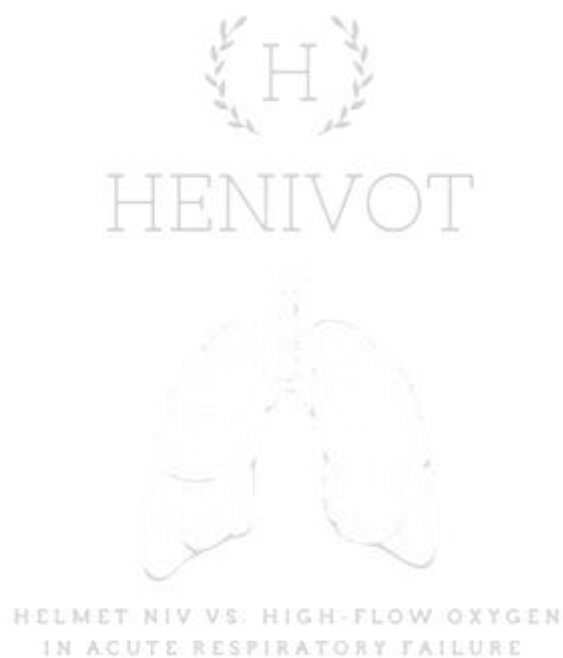

490 **Criteria for undergoing a spontaneous breathing trial**

491 During invasive mechanical ventilation, spontaneous breathing trial will be initiated as the  
492 following criteria are met:

- 493 a) improvement or resolution of the underlying cause of acute respiratory failure,
- 494 b) normal sensorium (alertness and ability to communicate),
- 495 c) correction of arterial hypoxemia ( $\text{PaO}_2 \geq 60$  mmHg at a  $\text{FiO}_2 \leq 40\%$  with  $\text{PEEP} \leq 5$  cmH<sub>2</sub>O);
- 496 d) absence of fever ( $\geq 38$  °C) or sepsis;
- 497 e) blood hemoglobin concentration of 7 g/dL or more;
- 498 f) hemodynamic stability without cardiac ischemia or arrhythmias (norepinephrine < 0.1  
499 gamma/kg/min).

500 Success of the spontaneous breathing trial will be defined as presence of the following criteria: 1)  
501 respiratory rate < 35/min, 2) arterial oxygen saturation  $\geq 90\%$ , 3) heart rate < 120/min, 4) systolic  
502 blood pressure > 90 and < 160 mmHg, 5) adequate cough. If the spontaneous breathing trial is  
503 successful, the patient will be extubated.

504 In case of SBT failure, mechanical ventilation will be resumed and new spontaneous breathing  
505 trials will be performed on a daily basis. The use of pressure support ventilation and proportional  
506 assist ventilation, as compared to assist-control modes, will be encouraged during the weaning  
507 phase.

508



HELMET NIV VS. HIGH-FLOW OXYGEN  
IN ACUTE RESPIRATORY FAILURE

509 **Figure 1.** VAS scale for dyspnea

510

511

512

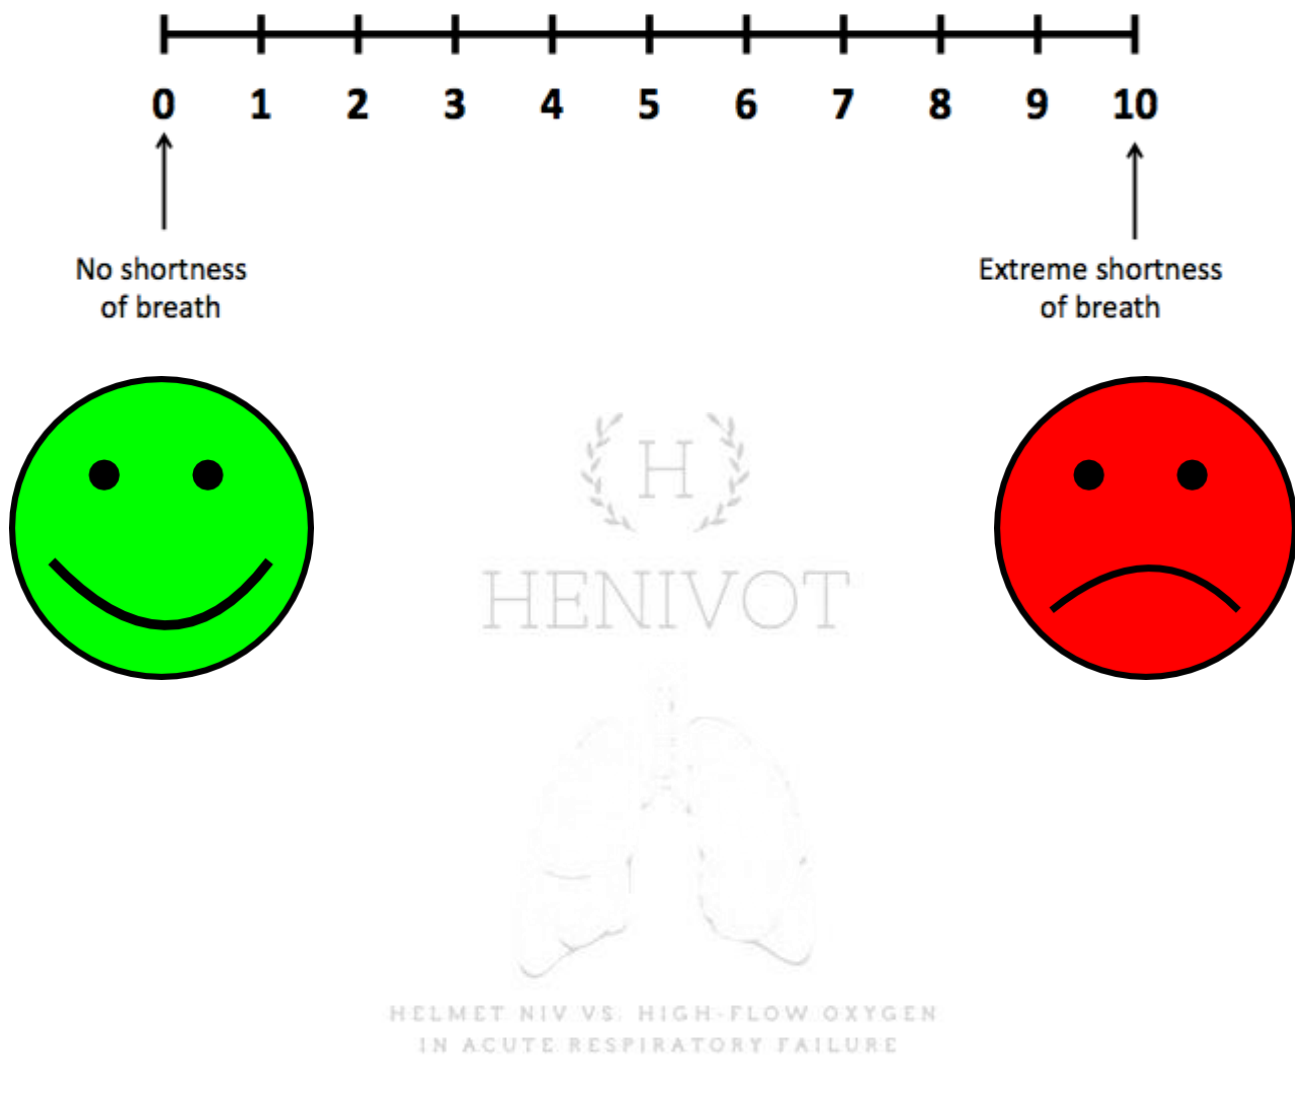



526 **Figure 3.** Richmond agitation and sedation scale

| RASS score                          |                   |                                                                                | CAM-ICU                                            |
|-------------------------------------|-------------------|--------------------------------------------------------------------------------|----------------------------------------------------|
| Richmond Agitation & Sedation Scale |                   |                                                                                |                                                    |
| Score                               | Description       |                                                                                |                                                    |
| +4                                  | Combative         | Violent, immediate danger to staff                                             | RASS $\geq$ -2<br>Proceed to CAM-ICU<br>assessment |
| +3                                  | Very agitated     | Pulls at or removes tubes, aggressive                                          |                                                    |
| +2                                  | Agitated          | Frequent non-purposeful movements, fights ventilator                           |                                                    |
| +1                                  | Restless          | Anxious, apprehensive but movements not aggressive or vigorous                 |                                                    |
| 0                                   | Alert & calm      |                                                                                |                                                    |
| -1                                  | Drowsy            | Not fully alert, sustained awakening to voice (eye opening & contact >10 secs) | RASS < -2<br>STOP<br>Recheck<br>later              |
| -2                                  | Light sedation    | Briefly awakens to voice (eye opening & contact < 10 secs)                     |                                                    |
| -3                                  | Moderate sedation | Movement or eye-opening to voice (no eye contact)                              |                                                    |
| -4                                  | Deep sedation     | No response to voice, but movement or eye opening to physical stimulation      |                                                    |
| -5                                  | Un-rousable       | No response to voice or physical stimulation                                   |                                                    |

527

528

HENIVOT

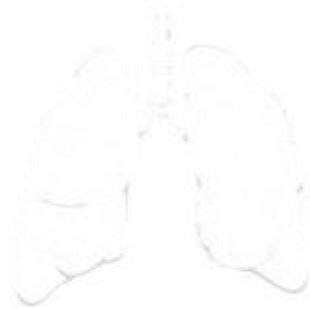

HELMET NIV VS. HIGH-FLOW OXYGEN  
IN ACUTE RESPIRATORY FAILURE

529 Table 1. Sequential Organ Failure Assessment (SOFA) score  
 530

| <b>SOFA score</b>                                                   | <b>0</b>          | <b>1</b>    | <b>2</b>                                 | <b>3</b>                                    | <b>4</b>                             |
|---------------------------------------------------------------------|-------------------|-------------|------------------------------------------|---------------------------------------------|--------------------------------------|
| <b>Respiration</b><br>PaO <sub>2</sub> /FIO <sub>2</sub><br>(mmHg)  | >400              | <400        | <300                                     | <200                                        | <100                                 |
| <b>Coagulation</b><br>Platelets<br>10 <sup>3</sup> /mm <sup>3</sup> | >150              | <150        | <100                                     | <50                                         | <20                                  |
| <b>Liver</b><br>Bilirubin<br>(mg/dL)                                | <1.2              | 1.2–<br>1.9 | 2.0–5.9                                  | 6.0–11.9                                    | >12.0                                |
| <b>Cardiovascular<sup>b</sup></b><br>Hypotension                    | No<br>hypotension | MAP<br><70  | Dopamine<br>≤5 or<br>dobutamine<br>(any) | Dopamine<br>>5 or<br>norepineph<br>rine≤0.1 | Dopamine>15 or<br>norepinephrine>0.1 |
| <b>CNS</b><br>Glasgow Coma<br>Score                                 | 15                | 13–<br>14   | 10–12                                    | 6–9                                         | <6                                   |
| <b>Renal</b><br>Creatinine<br>(mg/dL)<br>or urine output<br>(mL/d)  | <1.2              | 1.2–<br>1.9 | 2.0–3.4                                  | 3.5–4.9<br>or<br><500                       | >5.0<br>or<br><200                   |

531  
 532  
 533

HELMET NIV VS. HIGH-FLOW OXYGEN  
 IN ACUTE RESPIRATORY FAILURE



534 Table 2. The modified clinical pulmonary infection score  
 535

| <b>CPIS Points</b>                            | <b>0</b>             | <b>1</b>            | <b>2</b>                               |
|-----------------------------------------------|----------------------|---------------------|----------------------------------------|
| <i>Tracheal secretions</i>                    | Rare                 | Abundant            | Abundant + purulent                    |
| <i>Chest X-ray infiltrates</i>                | No infiltrate        | Diffused            | Localized                              |
| <i>Temperature, °C</i>                        | ≥ 36.5 and ≤ 38.4    | ≥ 38.5 and ≤ 38.9   | ≥ 39 or ≤ 36                           |
| <i>Leukocytes count, per mm<sup>3</sup></i>   | ≥ 4,000 and ≤ 11,000 | < 4,000 or > 11,000 | < 4,000 or > 11,000 + band forms ≥ 500 |
| <i>PAO<sub>2</sub>/FIO<sub>2</sub>, mm Hg</i> | > 240 or ARDS        |                     | ≤ 240 and no evidence of ARDS          |
| <i>Microbiology</i>                           | Negative             |                     | Positive                               |

536  
 537

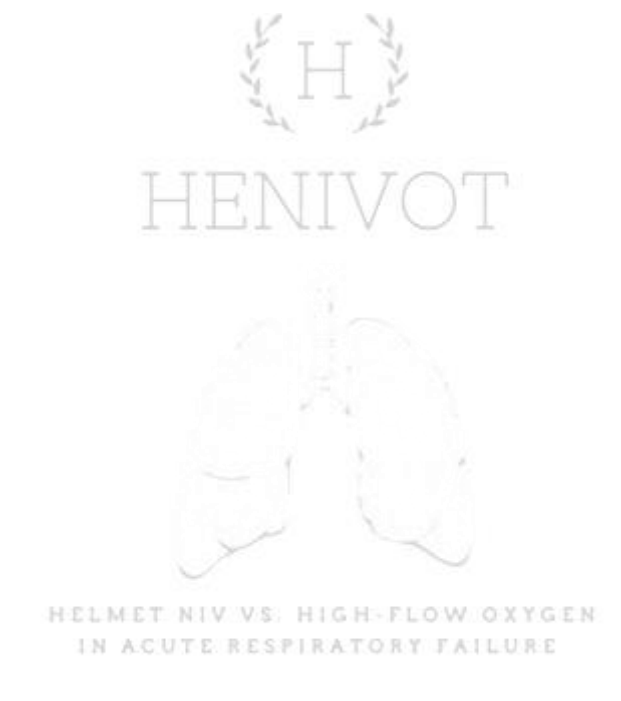

538 **References**

- 539 1. Brochard L, Mancebo J, Wysocki M, Lofaso F, Conti G, Rauss A, Simonneau G, Benito S,  
540 Gasparetto A, Lemaire F: **Noninvasive ventilation for acute exacerbations of chronic**  
541 **obstructive pulmonary disease.** *N Engl J Med* 1995, **333**:817–22.
- 542 2. Weng C-L, Zhao Y-T, Liu Q-H, Fu C-J, Sun F, Ma Y-L, Chen Y-W, He Q-Y: **Meta-analysis:**  
543 **Noninvasive ventilation in acute cardiogenic pulmonary edema.** *Ann Intern Med* 2010,  
544 **152**:590–600.
- 545 3. Masip J, Roque M, Sánchez B, Fernández R, Subirana M, Expósito JA: **Noninvasive**  
546 **ventilation in acute cardiogenic pulmonary edema: systematic review and meta-analysis.**  
547 *JAMA* 2005, **294**:3124–30.
- 548 4. Mariani J, MacChia A, Belziti C, Deabreu M, Gagliardi J, Doval H, Tognoni G, Tajer C:  
549 **Noninvasive ventilation in acute cardiogenic pulmonary edema: A meta-analysis of**  
550 **randomized controlled trials.** *J Card Fail* 2011, **17**:850–859.
- 551 5. Antonelli M, Conti G, Rocco M, Bui M, De Blasi RA, Vivino G, Gasparetto A, Meduri GU:  
552 **A comparison of noninvasive positive-pressure ventilation and conventional mechanical**  
553 **ventilation in patients with acute respiratory failure.** *N Engl J Med* 1998, **339**:429–35.
- 554 6. Antonelli M, Conti G, Bui M, Costa MG, Lappa A, Rocco M, Gasparetto A, Meduri GU:  
555 **Noninvasive ventilation for treatment of acute respiratory failure in patients undergoing**  
556 **solid organ transplantation: a randomized trial.** *JAMA* 2000, **283**:235–41.
- 557 7. Gristina GR, Antonelli M, Conti G, Ciarlone A, Rogante S, Rossi C, Bertolini G: **Noninvasive**  
558 **versus invasive ventilation for acute respiratory failure in patients with hematologic**  
559 **malignancies: A 5-year multicenter observational survey\*.** *Crit Care Med* 2011, **39**:2232–  
560 2239.
- 561 8. Antonelli M, Conti G, Esquinas A, Montini L, Maggiore SM, Bello G, Rocco M, Maviglia R,  
562 Pennisi MA, Gonzalez-Diaz G, et al.: **A multiple-center survey on the use in clinical**

- 563 **practice of noninvasive ventilation as a first-line intervention for acute respiratory**  
564 **distress syndrome.** *Crit Care Med* 2007, **35**:18–25.
- 565 9. Carrillo A, Gonzalez-Diaz G, Ferrer M, Martinez-Quintana ME, Lopez-Martinez A, Llamas  
566 N, Alcazar M, Torres A: **Non-invasive ventilation in community-acquired pneumonia and**  
567 **severe acute respiratory failure.** *Intensive Care Med* 2012, **38**:458–466.
- 568 10. Hilbert G, Gruson D, Vargas F, Valentino R, Gbikpi-Benissan G, Dupon M, Reiffers J,  
569 Cardinaud JP: **Noninvasive Ventilation in Immunosuppressed Patients with Pulmonary**  
570 **Infiltrates, Fever, and Acute Respiratory Failure.** *N Engl J Med* 2001, **344**:481–487.
- 571 11. Ferrer M, Esquinas A, Leon M, Gonzalez G, Alarcon A, Torres A: **Noninvasive Ventilation**  
572 **in Severe Hypoxemic Respiratory Failure: A Randomized Clinical Trial.** *Am J Respir Crit*  
573 *Care Med* 2003, **168**:1438–1444.
- 574 12. Papazian L, Corley A, Hess D, Fraser JF, Frat J-P, Guitton C, Jaber S, Maggiore SM, Nava S,  
575 Rello J, et al.: **Use of high-flow nasal cannula oxygenation in ICU adults: a narrative**  
576 **review.** *Intensive Care Med* 2016, **42**:1336–49.
- 577 13. Carreaux G, Millán-Guilarte T, De Prost N, Razazi K, Abid S, Thille AW, Schortgen F,  
578 Brochard L, Brun-Buisson C, Mekontso Dessap A: **Failure of Noninvasive Ventilation for**  
579 **De Novo Acute Hypoxemic Respiratory Failure: Role of Tidal Volume.** *Crit Care Med*  
580 2016, **44**:282–90.
- 581 14. Demoule A, Chevret S, Carlucci A, Kouatchet A, Jaber S, Meziani F, Schmidt M, Schnell D,  
582 Clergue C, Aboab J, et al.: **Changing use of noninvasive ventilation in critically ill**  
583 **patients: trends over 15 years in francophone countries.** *Intensive Care Med* 2016, **42**:82–  
584 92.
- 585 15. Demoule A, Girou E, Richard J-C, Taille S, Brochard L: **Benefits and risks of success or**  
586 **failure of noninvasive ventilation.** *Intensive Care Med* 2006, **32**:1756–1765.
- 587 16. Ferrer M, Esquinas A, Arancibia F, Bauer TT, Gonzalez G, Carrillo A, Rodriguez-Roisin R,

- 588 Torres A: **Noninvasive ventilation during persistent weaning failure: a randomized**  
589 **controlled trial.** *Am J Respir Crit Care Med* 2003, **168**:70–6.
- 590 17. Möller W, Celik G, Feng S, Bartenstein P, Meyer G, Oliver E, Schmid O, Tatkov S: **Nasal**  
591 **high flow clears anatomical dead space in upper airway models.** *J Appl Physiol* 2015,  
592 **118**:1525–32.
- 593 18. Mündel T, Feng S, Tatkov S, Schneider H: **Mechanisms of nasal high flow on ventilation**  
594 **during wakefulness and sleep.** *J Appl Physiol* 2013, **114**:1058–65.
- 595 19. Roca O, Riera J, Torres F, Masclans JR: **High-flow oxygen therapy in acute respiratory**  
596 **failure.** *Respir Care* 2010, **55**:408–413.
- 597 20. Corley a., Caruana LR, Barnett a. G, Tronstad O, Fraser JF: **Oxygen delivery through high-**  
598 **flow nasal cannulae increase end-expiratory lung volume and reduce respiratory rate in**  
599 **post-cardiac surgical patients.** *Br J Anaesth* 2011, **107**:998–1004.
- 600 21. Parke RL, McGuinness SP: **Pressures delivered by nasal high flow oxygen during all**  
601 **phases of the respiratory cycle.** *Respir Care* 2013, **58**:1621–4.
- 602 22. Maggiore SM, Idone FA, Vaschetto R, Festa R, Cataldo A, Antonicelli F, Montini L, De  
603 Gaetano A, Navalesi P, Antonelli M: **Nasal high-flow versus Venturi mask oxygen therapy**  
604 **after extubation. Effects on oxygenation, comfort, and clinical outcome.** *Am J Respir Crit*  
605 *Care Med* 2014, **190**:282–8.
- 606 23. Hernández G, Vaquero C, González P, Subira C, Frutos-Vivar F, Rialp G, Laborda C, Colinas  
607 L, Cuenca R, Fernández R: **Effect of Postextubation High-Flow Nasal Cannula vs**  
608 **Conventional Oxygen Therapy on Reintubation in Low-Risk Patients: A Randomized**  
609 **Clinical Trial.** *JAMA* 2016, **315**:1354–61.
- 610 24. Frat J-P, Thille AW, Mercat A, Girault C, Ragot S, Perbet S, Prat G, Boulain T, Morawiec E,  
611 Cottureau A, et al.: **High-flow oxygen through nasal cannula in acute hypoxemic**  
612 **respiratory failure.** *N Engl J Med* 2015, **372**:2185–96.

- 613 25. Nava S, Navalesi P, Gregoretti C: **Interfaces and humidification for noninvasive**  
614 **mechanical ventilation.** *Respir Care* 2009, **54**:71–84.
- 615 26. Antonelli M, Conti G, Pelosi P, Gregoretti C, Pennisi MA, Costa R, Severgnini P, Chiaranda  
616 M, Proietti R: **New treatment of acute hypoxemic respiratory failure: noninvasive**  
617 **pressure support ventilation delivered by helmet--a pilot controlled trial.** *Crit Care Med*  
618 2002, **30**:602–8.
- 619 27. Antonelli M, Pennisi MA, Pelosi P, Gregoretti C, Squadrone V, Rocco M, Cecchini L,  
620 Chiumello D, Severgnini P, Proietti R, et al.: **Noninvasive positive pressure ventilation**  
621 **using a helmet in patients with acute exacerbation of chronic obstructive pulmonary**  
622 **disease: a feasibility study.** *Anesthesiology* 2004, **100**:16–24.
- 623 28. Briel M, Meade M, Mercat A, Brower RG, Talmor D, Walter SD, Slutsky AS, Pullenayegum  
624 E, Zhou Q, Cook D, et al.: **Higher vs lower positive end-expiratory pressure in patients**  
625 **with acute lung injury and acute respiratory distress syndrome: systematic review and**  
626 **meta-analysis.** *JAMA* 2010, **303**:865–73.
- 627 29. Yoshida T, Roldan R, Beraldo MA, Torsani V, Gomes S, De Santis RR, Costa EL V., Tucci  
628 MR, Lima RG, Kavanagh BP, et al.: **Spontaneous Effort During Mechanical Ventilation.**  
629 *Crit Care Med* 2016, **44**:e678–e688.
- 630 30. Morais CCA, Koyama Y, Yoshida T, Plens GM, Gomes S, Lima CAS, Ramos OPS, Pereira  
631 SM, Kawaguchi N, Yamamoto H, et al.: **High Positive End-Expiratory Pressure Renders**  
632 **Spontaneous Effort Noninjurious.** *Am J Respir Crit Care Med* 2018, **197**:1285–1296.
- 633 31. Patel BK, Wolfe KS, Pohlman AS, Hall JB, Kress JP: **Effect of Noninvasive Ventilation**  
634 **Delivered by Helmet vs Face Mask on the Rate of Endotracheal Intubation in Patients**  
635 **With Acute Respiratory Distress Syndrome: A Randomized Clinical Trial.** *JAMA* 2016,  
636 **315**:2435–41.
- 637 32. Grieco DL, Menga LS, Raggi V, Bongiovanni F, Anzellotti GM, Tanzarella ES, Bocci MG,

- 638 Mercurio G, Dell'Anna AM, Eleuteri D, et al.: **Physiological Comparison of High-Flow**  
639 **Nasal Cannula and Helmet Noninvasive Ventilation in Acute Hypoxemic Respiratory**  
640 **Failure.** *Am J Respir Crit Care Med* 2020, **201**:303–312.
- 641 33. Coudroy R, Frat J-P, Girault C, Thille AW: **Reliability of methods to estimate the fraction**  
642 **of inspired oxygen in patients with acute respiratory failure breathing through non-**  
643 **rebreather reservoir bag oxygen mask.** *Thorax* 2020, doi:10.1136/thoraxjnl-2020-214863.
- 644 34. Grieco DL, Toni F, Santantonio MT, Spaziani L, Natalini D, Idone FA, Montini L, Antonelli  
645 M, Maggiore SM: **Comfort during high-flow oxygen therapy through nasal cannula in**  
646 **critically ill patients: effects of gas temperature and flow.** *Intensive Care Med* 2013,  
647 **39**:512.
- 648 35. Chiumello D, Chierichetti M, Tallarini F, Cozzi P, Cressoni M, Polli F, Colombo R, Castelli  
649 A, Gattinoni L: **Effect of a heated humidifier during continuous positive airway pressure**  
650 **delivered by a helmet.** *Crit Care* 2008, **12**:R55.
- 651 36. Ueta K, Tomita T, Uchiyama A, Ohta N, Iguchi N, Goto Y, Fujino Y: **Influence of**  
652 **humidification on comfort during noninvasive ventilation with a helmet.** *Respir Care*  
653 2013, **58**:798–804.
- 654 37. Mojoli F, Iotti G a, Currò I, Pozzi M, Via G, Venti A, Braschi A: **An optimized set-up for**  
655 **helmet noninvasive ventilation improves pressure support delivery and patient-**  
656 **ventilator interaction.** *Intensive Care Med* 2013, **39**:38–44.
- 657 38. Ferrone G, Cipriani F, Spinazzola G, Festa O, Arcangeli A, Proietti R, Antonelli M, Conti G,  
658 Costa R: **A bench study of 2 ventilator circuits during helmet noninvasive ventilation.**  
659 *Respir Care* 2013, **58**:1474–81.
- 660 39. Taccone P, Hess D, Caironi P, Bigatello LM: **Continuous positive airway pressure**  
661 **delivered with a “helmet”: effects on carbon dioxide rebreathing.** *Crit Care Med* 2004,  
662 **32**:2090–2096.

- 663 40. Muriel A, Peñuelas O, Frutos-Vivar F, Arroliga AC, Abraira V, Thille AW, Brochard L, Nin  
664 N, Davies AR, Amin P, et al.: **Impact of sedation and analgesia during noninvasive**  
665 **positive pressure ventilation on outcome: a marginal structural model causal analysis.**  
666 *Intensive Care Med* 2015, **41**:1586–1600.
- 667 41. Nava S, Gregoretti C, Fanfulla F, Squadrone E, Grassi M, Carlucci A, Beltrame F, Navalesi P:  
668 **Noninvasive ventilation to prevent respiratory failure after extubation in high-risk**  
669 **patients.** *Crit Care Med* 2005, **33**:2465–70.
- 670 42. Funk G-C, Anders S, Breyer M-K, Burghuber OC, Edelmann G, Heindl W, Hinterholzer G,  
671 Kohansal R, Schuster R, Schwarzmaier-D'Assie a, et al.: **Incidence and outcome of**  
672 **weaning from mechanical ventilation according to new categories.** *Eur Respir J* 2010,  
673 **35**:88–94.
- 674 43. Puntillo KA, White C, Morris AB, Perdue ST, Stanik-Hutt J, Thompson CL, Wild LR:  
675 **Patients' perceptions and responses to procedural pain: Results from thunder project II.**  
676 *Am J Crit Care* 2001, **10**:238–251.



HELMET NIV VS. HIGH-FLOW OXYGEN  
IN ACUTE RESPIRATORY FAILURE
