# Supplementary material
Source: PubMed Central journal article supplement (PMC7995134)
Supplement: jama-e214682-s003.pdf [file jama-e214682-s003.pdf]

## Supplemental Online Content

Grieco DL, Menga LS, Cesarano M, et al; COVID-ICU Gemelli Study Group. Effect of helmet noninvasive ventilation vs high-flow nasal oxygen on days free of respiratory support in patients with COVID-19 and moderate to severe hypoxemic respiratory failure: the HENIVOT randomized clinical trial. Published March 25, 2021. *JAMA*. doi:10.1001/jama.2021.4682

### **eAppendix.** Exclusion Criteria

**eTable 1.** Primary and Secondary Outcomes, According to Study Group in the Prespecified Secondary Analysis Including All Patients Who Did Not Show Major Protocol Deviations

**eTable 2.** Physiological Outcomes, According to Study Group in the Overall Population

**eFigure 1.** Helmet Noninvasive Ventilation and High-Flow Nasal Cannula in the First 48 Hours

**eFigure 2.** Kaplan-Meier Plots of the Cumulative Incidence of Intubation From Randomization to Day 28 Cohort of Prespecified Secondary Analysis

**eFigure 3.** Patients' Management After Randomization Up to 28 Days

**eFigure 4.** Richmond Agitation-Sedation Scale in the Overall Population in the First 48 Hours

This supplemental material has been provided by the authors to give readers additional information about their work.

### **eAppendix. Exclusion criteria**

- Pregnancy;
- Body mass index >40;
- Exacerbation of asthma or chronic obstructive pulmonary disease;
- Known hypercapnia ( $\text{PaCO}_2 > 45$  mmHg) with or without respiratory acidosis;
- More than 2 organ failures, including the lung.
- Documented pneumothorax;
- Clinical diagnosis of Cardiogenic pulmonary oedema;
- Haemodynamic instability (Systolic blood pressure <90 mmHg or mean arterial pressure <65 mmHg) and/or lactic acidosis (lactate >5 mmol/L) and/or clinically diagnosed Shock requiring administration of vasoactive agents (norepinephrine >0.1 mcg/Kg/min);
- Metabolic Acidosis (pH <7.30 with normal- or hypo-carbia);
- Chronic kidney failure requiring dialysis before ICU admission;
- Chronic hypoxemic respiratory failure requiring long-term oxygen therapy;
- Altered neurological status that requires immediate intubation and/or making the patient uncooperative;
- Urgent need for endotracheal intubation, according to the decision of the attending physician;
- Do not intubate order;
- Decision of withdrawal of life-sustaining therapy;
- Thoracic or abdominal surgery in the previous 7 days;
- Any condition that makes the patient very likely to require endotracheal intubation due to a reason different from respiratory failure;
- Recent head surgery or anatomy that prevent the application of helmet or Optiflow to patient's face.

Patients that have already received NIV continuously for more than 12 hours before the screening visit were excluded.

| <b>eTable 1. Primary and secondary outcomes, according to Study Group in the pre-specified secondary analysis including all patients who did not show major protocol deviations.</b> |                                       |                               |                          |                     |         |
|--------------------------------------------------------------------------------------------------------------------------------------------------------------------------------------|---------------------------------------|-------------------------------|--------------------------|---------------------|---------|
| Outcome                                                                                                                                                                              | Helmet Noninvasive Ventilation (n=53) | High-flow nasal oxygen (n=54) | Absolute difference (CI) | Odds Ratio (CI)     | p-value |
| <b>Primary outcome</b>                                                                                                                                                               |                                       |                               |                          |                     |         |
| Respiratory support free days                                                                                                                                                        | 20 [1-25]                             | 19 [0 - 22]                   | 2 (-2 to 6)              |                     | 0.25    |
| <b>Secondary outcomes</b>                                                                                                                                                            |                                       |                               |                          |                     |         |
| Intubation within 28 days from enrolment                                                                                                                                             | 15 (28)                               | 27 (50)                       | - 22 (-38 to -3)         | 0.39 (0.18 to 0.88) | 0.029   |
| Intubation within 28 days from enrolment, after the adjudication of the external committee                                                                                           | 14 (26)                               | 27 (50)                       | - 24 (-40 to -5)         | 0.36 (0.16 to 0.81) | 0.017   |
| 28-day invasive ventilation free days                                                                                                                                                | 28 [15 - 28]                          | 26 [4 - 28]                   | 4 (0 to 8)               |                     | 0.034   |
| 60-day invasive ventilation free days                                                                                                                                                | 60 [47 - 60]                          | 58 [19 - 60]                  | 6 (-3 to 15)             |                     | 0.06    |
| 28-day mortality                                                                                                                                                                     | 7 (13)                                | 9 (17)                        | -3 (-17 to 10)           | 0.76 (0.26 to 2.22) | 0.79    |
| 60-day mortality                                                                                                                                                                     | 12 (23)                               | 11 (20)                       | 2 (-13 to 18)            | 1.14 (0.45 to 2.88) | 0.82    |
| In-intensive care unit mortality                                                                                                                                                     | 10 (19)                               | 13 (24)                       | -5 (-21 to 10)           | 0.73 (0.29 to 1.86) | 0.64    |
| In-hospital mortality †                                                                                                                                                              | 12 (23)                               | 13 (24)                       | -1 (-18 to 15)           | 0.92 (0.38 to 2.26) | > 0.99  |
| Duration of stay in the intensive care unit, days                                                                                                                                    | 9 [4 - 17]                            | 10 [5 - 23]                   | -6 (-13 to 1)            |                     | 0.26    |
| Duration of stay in the hospital, days                                                                                                                                               | 21 [14-30]                            | 22 [13 - 45]                  | -7 (-15 to 1)            |                     | 0.53    |
| <b>Safety endpoints</b>                                                                                                                                                              |                                       |                               |                          |                     |         |
| Hours to intubation                                                                                                                                                                  | 32 [8 - 72]                           | 19 [4 - 49]                   | 0 (-54 to 54)            |                     | 0.28    |
| Emergency intubation                                                                                                                                                                 | 0 (0)                                 | 0 (0)                         |                          |                     | > 0.99  |
| Causes of endotracheal intubation – no. of patients (%)                                                                                                                              |                                       |                               |                          |                     |         |
| Hypoxemia (lack of improvement)                                                                                                                                                      | 14 (26)                               | 26 (48)                       | -22 (-38 to -3)          | 0.39 (0.17 to 0.87) | 0.028   |
| Signs of respiratory muscles fatigue                                                                                                                                                 | 12 (23)                               | 24 (44)                       | -22 (-38 to -4)          | 0.37 (0.16 to 0.85) | 0.024   |
| Intolerance to treatment                                                                                                                                                             | 10 (19)                               | 5 (9)                         | 10 (-4 to 23)            | 2.28 (0.72 to 7.19) | 0.17    |
| SpO <sub>2</sub> below 90% for more than 5 minutes                                                                                                                                   | 9 (17)                                | 22 (41)                       | -24 (-39 to -7)          | 0.30 (0.12 to 0.73) | 0.01    |
| Worsening or unbearable dyspnea                                                                                                                                                      | 8 (15)                                | 24 (44)                       | -29 (-44 to -12)         | 0.22 (0.09 to 0.56) | 0.001   |
| Altered mental status                                                                                                                                                                | 1 (2)                                 | 1 (2)                         | 0 (-8 to 8)              | 1.02 (0.06 to 17)   | > 0.99  |
| Shock                                                                                                                                                                                | 1 (2)                                 | 1 (2)                         | 0 (-8 to 8)              | 1.02 (0.06 to 17)   | > 0.99  |
| Hypercapnia                                                                                                                                                                          | 1 (2)                                 | 0 (0)                         | 2 (-5 to 10)             |                     | 0.49    |
| Inability to clear secretions                                                                                                                                                        | 1 (2)                                 | 0 (0)                         | 2 (-5 to 10)             |                     | 0.49    |
| <b>Adverse events</b>                                                                                                                                                                |                                       |                               |                          |                     |         |
| Intensive care unit-acquired infections §                                                                                                                                            | 16 (30)                               | 22 (41)                       | - 11 (-28 to 7)          | 0.63 (0.28 to 1.40) | 0.31    |
| Ventilator-associated pneumonia                                                                                                                                                      | 14 (26)                               | 18 (33)                       | - 7 (-24 to 10)          | 0.72 (0.31 to 1.65) | 0.53    |
| Septic shock                                                                                                                                                                         | 11 (21)                               | 19 (35)                       | - 14 (-30 to 3)          | 0.48 (0.20 to 1.15) | 0.13    |
| Tracheostomy                                                                                                                                                                         | 4 (7)                                 | 11 (20)                       | - 13 (-26 to 1)          | 0.32 (0.09 to 1.08) | 0.09    |
| Acute kidney injury requiring renal replacement therapy                                                                                                                              | 3 (6)                                 | 8 (15)                        | - 9 (-22 to 3)           | 0.35 (0.09 to 1.38) | 0.20    |

|                                     |       |        |                 |                     |      |
|-------------------------------------|-------|--------|-----------------|---------------------|------|
| Barotrauma §                        | 2 (4) | 7 (13) | - 9 (-21 to 2)  | 0.26 (0.05 to 1.33) | 0.16 |
| Pneumothorax                        | 2 (4) | 4 (7)  | - 4 (-14 to 6)  | 0.49 (0.09 to 2.8)  | 0.78 |
| Subcutaneous emphysema              | 0 (0) | 5 (9)  | - 9 (-20 to -1) |                     | 0.06 |
| Upper limb vein thrombosis          | 1 (2) | 0 (0)  | 2 (-5 to 10)    |                     | 0.49 |
| Extracorporeal membrane oxygenation | 0 (0) | 3 (6)  | - 6 (-15 to 2)  |                     | 0.24 |
| Liver failure                       | 0 (0) | 2 (4)  | - 4 (-13 to 4)  |                     | 0.49 |

There were no missing data among the two groups.

\*Values are displayed as median [interquartile range], if not otherwise specified. For non-normal quantitative variables comparison between groups was performed with Mann-Whitney test.

Comparison between groups for qualitative variables were performed with the Chi-Squared test or the Fisher's exact test, as appropriate in agreement with tests assumptions.

All the calculations were unadjusted.

Physiological outcomes (PaO<sub>2</sub>/F<sub>i</sub>O<sub>2</sub>, PaCO<sub>2</sub>, Respiratory rate, Discomfort related to the device and Dyspnoea) at 1-6-12-24-48-72 hours after randomization are reported in Figure 4.

Respiratory support: invasive or noninvasive mechanical ventilation, high-flow nasal cannula

† One patient was discharged from hospital but died upon readmission

§ Subcategories may not tally with the category total.

What is reported are number of patients with the event rather than number of events.

| <b>eTable 2. Physiological outcomes, according to Study Group in the overall population.</b>                                                                    |                                       |                               |                      |         |
|-----------------------------------------------------------------------------------------------------------------------------------------------------------------|---------------------------------------|-------------------------------|----------------------|---------|
| Outcome                                                                                                                                                         | Helmet Noninvasive Ventilation (n=53) | High-flow nasal oxygen (n=54) | Mean difference (CI) | p-value |
| Mean PaO <sub>2</sub> /FiO <sub>2</sub> in the first 48 hours after enrolment, PaO <sub>2</sub> /FiO <sub>2</sub> ratio                                         | 188 (73)                              | 138 (46)                      | 50 (39 to 61)        | < 0.001 |
| Mean PaCO <sub>2</sub> in the first 48 hours after enrolment, PaCO <sub>2</sub> – mmHg                                                                          | 36 (5)                                | 35 (4)                        | 1 (0 to 2)           | 0.008   |
| Mean Respiratory rate in the first 48 hours after enrolment - breaths per minute                                                                                | 24 (5)                                | 24 (5)                        | 0 (-1 to 1)          | 0.82    |
| Mean Dyspnea in the first 48 hours after enrolment - Visual Analogue Scale                                                                                      | 1.9 (2)                               | 2.5 (2.2)                     | -0.5 (-1 to -0.2)    | 0.003   |
| Mean Device-related discomfort in the first 48 hours after enrolment - Visual Analogue Scale                                                                    | 3.7 (3.1)                             | 1.8 (2.4)                     | 1.9 (1.4 to 2.5)     | < 0.001 |
| Comparisons between groups were performed with a one-way ANOVA; being the missing data due to endotracheal intubation, they were not accounted in the analysis. |                                       |                               |                      |         |

**eFigure 1.**

In the upper panel, the main setting of Helmet noninvasive ventilation (Helmet NIV) in the first 48 hours are shown.

In the lower panel the setting of high-flow nasal cannula (HFNC) in the first 48 hours are shown. After intubation patients were excluded from the analysis. Box plots are shown where the middle line represents the median observed value, boxes represent the interquartile range, whiskers extend to the most extreme observed values with 1.5\*IQR of the nearer quartile, and dots represent observed values outside that range.

**eFigure 2.**

Kaplan–Meier Plots of the Cumulative Incidence of Intubation from Randomization to day 28 cohort of prespecified secondary analysis, conducted after the exclusion of 2 patients that showed major protocol deviations.

**eFigure 3.**

Patients' management after randomization up to 28 days. Each bar represents an individual patient.

**eFigure 4.**

Richmond Agitation-Sedation Scale in the overall population in the first 48 hours. After endotracheal intubation patients were excluded from the analysis.

Richmond Agitation-Sedation Scale is a 10-point scale, with four levels of anxiety or agitation: 0 denoting a calm and alert state, +4 representing a very combative, violent patient, and – 5 representing an unarousable patient.

E- Figure 1

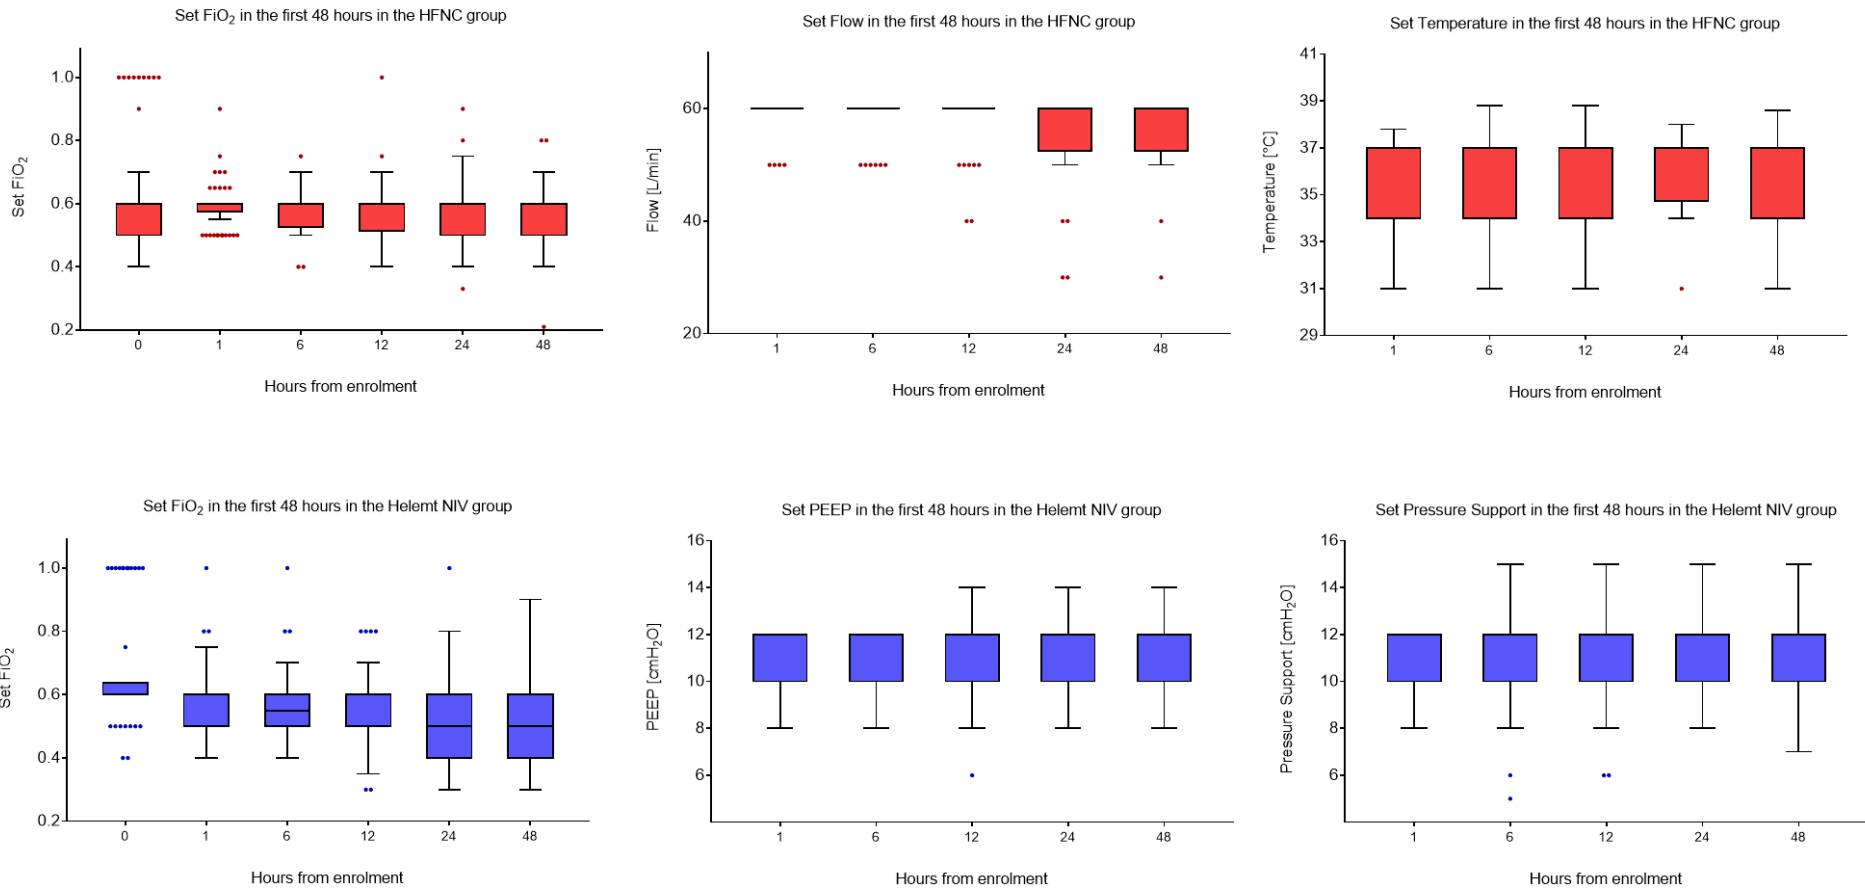

E- Figure 2 – Secondary analysis

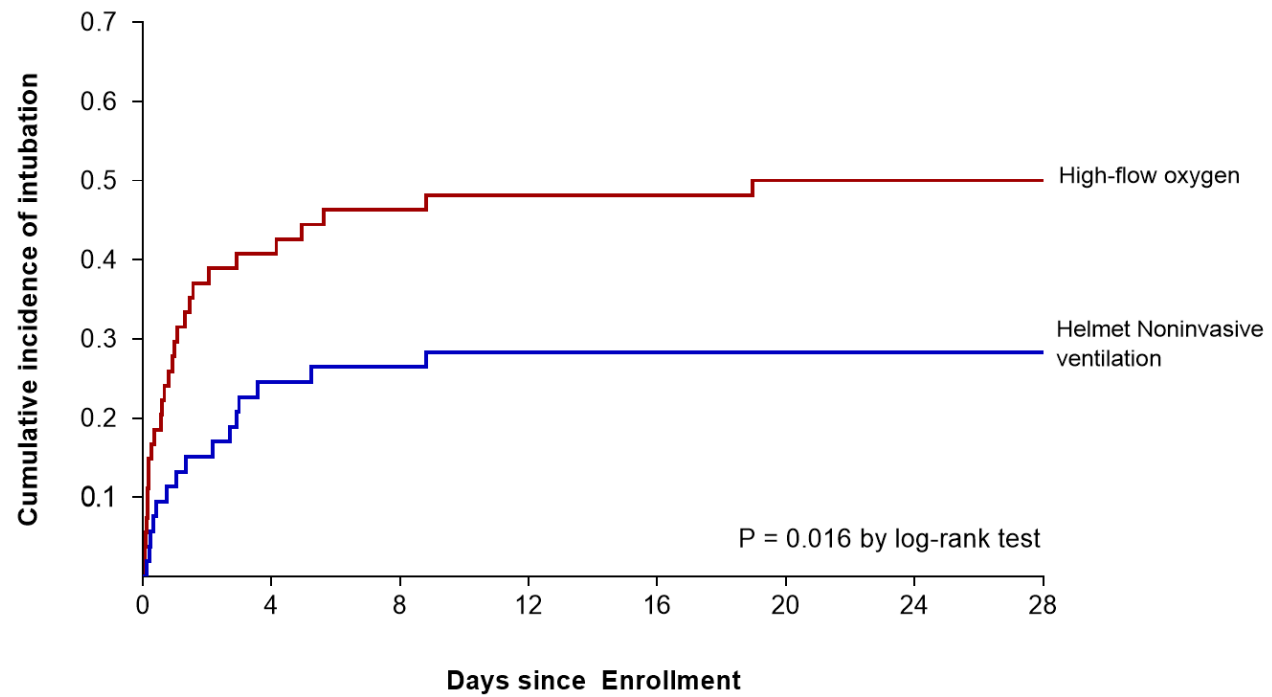

**No. At risk**

|                                |    |    |    |    |    |    |    |    |
|--------------------------------|----|----|----|----|----|----|----|----|
| High-flow oxygen               | 54 | 34 | 30 | 28 | 28 | 27 | 27 | 27 |
| Helmet noninvasive ventilation | 53 | 41 | 39 | 38 | 38 | 38 | 38 | 38 |



E- Figure 3

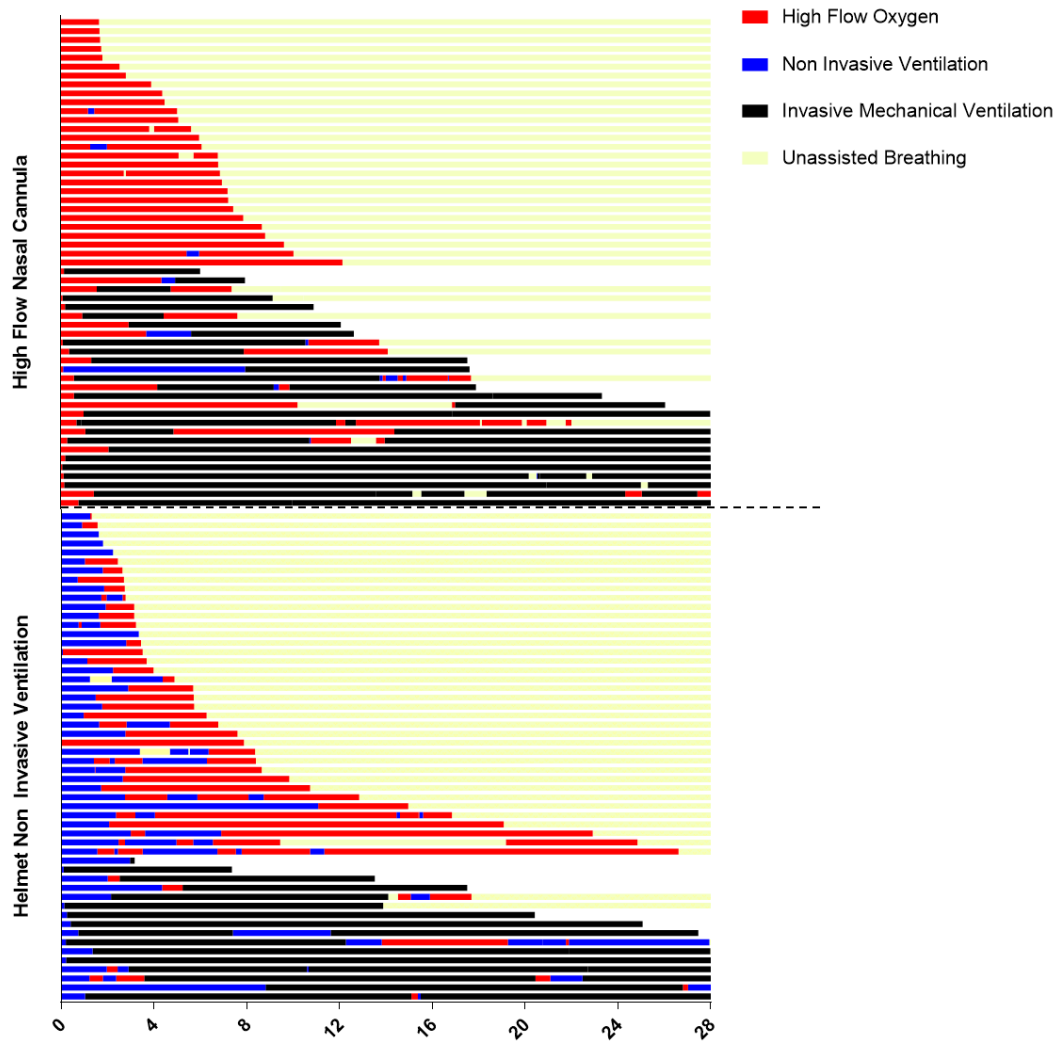

E- Figure 4

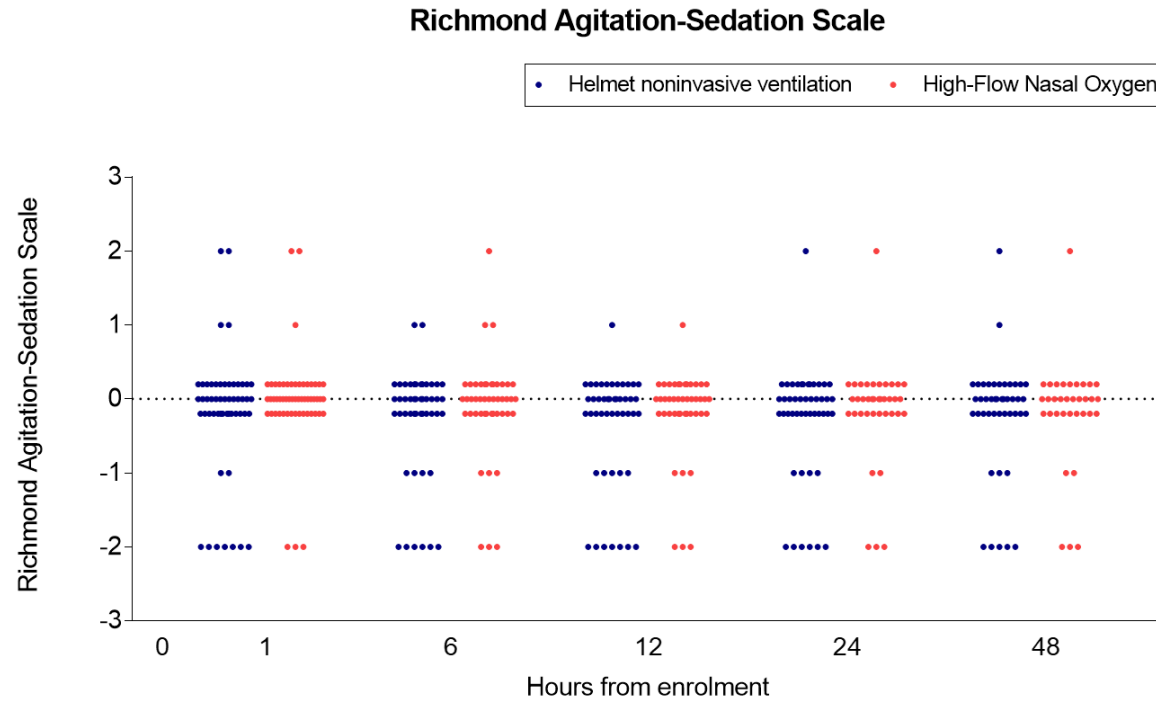

|                         |    |    |    |    |    |    |
|-------------------------|----|----|----|----|----|----|
| High Flow Nasal Cannula | 55 | 55 | 46 | 44 | 38 | 34 |
| Helmet NIV              | 54 | 53 | 48 | 47 | 44 | 44 |
