# Supplementary material
Source: PubMed Central journal article supplement (PMC7995134)
Supplement: jama-e214682-s004.pdf [file jama-e214682-s004.pdf]

Supplemental Online Content: Nonauthor Collaborators

\*Indicates required information. Only first name, last name, and suffix will appear in PubMed.

| <b>Group Name(s):COVID-ICU Gemelli study group</b> |            |                       |                  |             |                                          |                                                         |                                                                                            |
|----------------------------------------------------|------------|-----------------------|------------------|-------------|------------------------------------------|---------------------------------------------------------|--------------------------------------------------------------------------------------------|
| First Name and Middle Initial(s)*                  | Last Name* | Suffix (eg, Jr, III)* | Academic Degrees | Institution | Location (city, state/province, country) | Role or Contribution, eg, chair, principal investigator | Group (if more than 1 Group listed in the byline) and/or Subgroup (eg, Steering Committee) |
| Gian Marco                                         | Anzellotti |                       |                  |             |                                          |                                                         |                                                                                            |
| Laura                                              | Cascarano  |                       |                  |             |                                          |                                                         |                                                                                            |
| Francesca                                          | Ceccaroni  |                       |                  |             |                                          |                                                         |                                                                                            |
| Paolo                                              | De Santis  |                       |                  |             |                                          |                                                         |                                                                                            |
| Mariangela                                         | Di Muro    |                       |                  |             |                                          |                                                         |                                                                                            |
| Miriana                                            | Durante    |                       |                  |             |                                          |                                                         |                                                                                            |
| Nicoletta                                          | Filetici   |                       |                  |             |                                          |                                                         |                                                                                            |
| Veronica                                           | Gennenzi   |                       |                  |             |                                          |                                                         |                                                                                            |
| Antonio                                            | Gulli      |                       |                  |             |                                          |                                                         |                                                                                            |
| Gianmarco                                          | Lombardi   |                       |                  |             |                                          |                                                         |                                                                                            |
| Alessio                                            | Maccaglia  |                       |                  |             |                                          |                                                         |                                                                                            |
| Riccardo                                           | Maviglia   |                       |                  |             |                                          |                                                         |                                                                                            |
| Alessandro                                         | Mele       |                       |                  |             |                                          |                                                         |                                                                                            |
| Giovanna                                           | Mercurio   |                       |                  |             |                                          |                                                         |                                                                                            |
| Teresa                                             | Michi      |                       |                  |             |                                          |                                                         |                                                                                            |
| Tony C.                                            | Morena     |                       |                  |             |                                          |                                                         |                                                                                            |
| Martina                                            | Murdolo    |                       |                  |             |                                          |                                                         |                                                                                            |
| Mariano Alberto                                    | Pennisi    |                       |                  |             |                                          |                                                         |                                                                                            |
| Stefania                                           | Postorino  |                       |                  |             |                                          |                                                         |                                                                                            |
| Antonella                                          | Potalivo   |                       |                  |             |                                          |                                                         |                                                                                            |
| Francesca                                          | Pozzana    |                       |                  |             |                                          |                                                         |                                                                                            |
| Carlotta                                           | Rubino     |                       |                  |             |                                          |                                                         |                                                                                            |
| Martina                                            | Savino     |                       |                  |             |                                          |                                                         |                                                                                            |
| Roberta                                            | Scarascia  |                       |                  |             |                                          |                                                         |                                                                                            |
| Angela                                             | Scavone    |                       |                  |             |                                          |                                                         |                                                                                            |
| Donatella                                          | Settanni   |                       |                  |             |                                          |                                                         |                                                                                            |
| Serena                                             | Silva      |                       |                  |             |                                          |                                                         |                                                                                            |
| Flavia                                             | Torrini    |                       |                  |             |                                          |                                                         |                                                                                            |
| Joel                                               | Vargas     |                       |                  |             |                                          |                                                         |                                                                                            |
| Carmelina                                          | Zaccone    |                       |                  |             |                                          |                                                         |                                                                                            |
