# Supplementary material
Source: PubMed Central journal article supplement (PMC7995134)
Supplement: jama-e214682-s005.pdf [file jama-e214682-s005.pdf]

## Data Sharing Statement

Grieco. Effect of Helmet Noninvasive Ventilation vs High-Flow Nasal Oxygen on Days Free of Respiratory Support in Patients With COVID-19 and Moderate to Severe Hypoxemic Respiratory Failure. *JAMA*. Published March 25, 2021. doi:10.1001/jama.2021.4682

### Data

**Data available:** Yes

**Data types:** Deidentified participant data

**How to access data:** Data will be available upon reasonable request by dr Grieco, [dlgrieco@outlook.it](mailto:dlgrieco@outlook.it)

**When available:** With publication

### Supporting Documents

**Document types:** None

### Additional Information

**Who can access the data:** researchers whose proposed use of the data has been approved

**Types of analyses:** purposes approved by the steering committee

**Mechanisms of data availability:** without investigator support, after approval of a proposal,

**Any additional restrictions:** none
